# Supplementary material
Source: publisher site journal article supplement (https://www.degruyter.com/publication/journal_key/NOISE/downloadAsset/NOISE_CFP%20Strategic%20noise%20mapping%20in%20the%20CNOSSOS%20EU%20era.pdf)
Supplement: Supplementary file 1 [file NOISE_CFP%20Strategic%20noise%20mapping%20in%20the%20CNOSSOS%20EU%20era.pdf]

## SPECIAL ISSUE on Strategic noise mapping in the CNOSSOS-EU era

### GUEST EDITORS

---

César Asensio, [c.asensio@upm.es](mailto:c.asensio@upm.es)

Universidad Politécnica de Madrid, ETSI Sistemas de Telecomunicación

Gaetano Licitra, [g.licitra@arp.at.toscana.it](mailto:g.licitra@arp.at.toscana.it)

ARPAT, Environmental Protection Agency of Tuscany Region

### DESCRIPTION

---

Twenty years after the adoption of the Environmental Noise Directive in the European Union, in 2022 we are facing a round of strategic noise mapping in which the harmonized calculation method CNOSSOS-EU comes into force to replace the interim methods. The adaptation of the different Member States, consultants and practitioners has been a major challenge in many respects. With this special issue "**Strategic noise mapping in the CNOSSOS-EU era**", the aim is to address the progress, points of interest, and the main challenges of the new methodological framework. The special issue will address a) progress, strengths and weaknesses of the methods and their application, as well as lessons learned, or gaps identified, b) the evaluation of the exposure outcomes obtained in the different rounds may open discussions among the public and the administrations, c) the potential revising of the action plans could interest agglomerations and above all infrastructures for the changing priorities.

This thematic special issue in [Noise Mapping](#) is devoted to the publication of Research articles, technical notes, case studies and review articles, but also to short communications.

Contributions to the Special Issue may address (but are not limited) to the following aspects:

- Strategic noise maps
- New approach to the noise mapping with smart sensors and big data Action plans
- Adaptation to the new method and challenges
- Available and missing data; Methods for acquisition of input data Validation in different scenarios
- Comparative analyses and temporal trends
- Simplifications and default values Uncertainty and quality framework Case studies
- New challenges after the implementation of the END

Authors are requested to submit their full research papers complying the general scope of the journal. The submitted papers will undergo the standard peer-review process before they can be accepted. Notification of acceptance will be communicated as we progress with the review process.

# HOW TO SUBMIT

---

Before submission authors should carefully read the [Instruction for Authors](#).

Manuscripts can be written in TeX, LaTeX (strongly recommended) - the journal's [LATEX template](#). Please note that we do not accept papers in Plain TEX format. Text files can be also submitted as standard DOCUMENT (.DOC) which is acceptable if the submission in LATEX is not possible. **For an initial submission, the authors are strongly advised to upload their entire manuscript, including tables and figures, as a single PDF file.**

All submissions to the Special Issue must be made electronically via online submission system Editorial Manager: [www.editorialmanager.com/noise](http://www.editorialmanager.com/noise)

All manuscripts will undergo the standard peer-review process (single blind, at least two independent reviewers). When entering your submission via online submission system please choose the option "**SI: SNM in the CNOSSOS-EU era**".

Submission of a manuscript implies that the work described has not been published before as a whole or as a part in any medium by the authors or anyone else and it is not under consideration for publication elsewhere. For more details please see [Publishing Ethics](#) and documents available in the Supplementary Materials section at the journal website.

**The deadline for submissions is December 2024**, but individual papers will be reviewed and published online on an ongoing basis.

Contributors to the Special Issue will benefit from:

- **indexation in SCOPUS and Web of Science**
- fixed APC that amounts to 500 EUR
- fair and constructive peer review provided by experts in the field no space constraints
- convenient, web-based paper submission and tracking system – Editorial Manager
- quick online publication upon completing the publishing process (continuous publication model)
- **liberal policies on copyrights** (authors retain copyrights) and on self-archiving (no embargo periods) \*\*
- better visibility due to Open Access
- long-term preservation of the content
- promotion of published papers to readers and citers

\*\* The use of article will be governed by the Creative-Commons Attribution license (CC-BY) [License to Publish document](#) (in PDF)

[Noise Mapping](#) applies Article Processing Charges ([APC](#)), to cover costs of publication in open access. There is no submission fee.

We are looking forward to your submission!

In case of any questions please contact **Dr. Natalia Mikołajczak**, Managing Editor of Noise Mapping, [natalia.mikolajczak@degruyter.com](mailto:natalia.mikolajczak@degruyter.com)
